# Supplementary material for: The Polar Lipidome of Cultured Emiliania huxleyi: A Source of Bioactive Lipids with Relevance for Biotechnological Applications
Source: MDPI journal article supplement (doi:10.3390/biom10101434), 2020-10-12
Supplement: s1 [file s1]

Article

# The Polar Lipidome of Cultured *Emiliana huxleyi*: A source of Bioactive Lipids with Relevance for Biotechnological Applications

Susana S. Aveiro <sup>1</sup>, Tânia Melo <sup>2</sup>, Ana Figueiredo <sup>1</sup>, Pedro Domingues <sup>1</sup>, Hugo Pereira <sup>3</sup>, Inês B. Maia <sup>4</sup>, Joana Silva <sup>5</sup>, M. Rosário Domingues <sup>1,2</sup>, Cláudia Nunes <sup>6</sup> and Ana S. P. Moreira <sup>1,6,\*</sup>

<sup>1</sup> Mass Spectrometry Center, LAQV-REQUIMTE, Department of Chemistry, University of Aveiro, Campus Universitário de Santiago, 3810-193 Aveiro, Portugal; s.aveiro@ua.pt (S.S.A.), ana90@ua.pt (A.F.), p.domingues@ua.pt (P.D.), mrd@ua.pt (M.R.D.); ana.moreira@ua.pt (A.M.)

<sup>2</sup> ECOMARE, CESAM - Centre for Environmental and Marine Studies, Department of Chemistry, University of Aveiro, Campus Universitário de Santiago, 3810-193 Aveiro, Portugal; taniamelo@ua.pt

<sup>3</sup> Green Colab - Associação Oceano Verde, University of Algarve, Campus de Gambelas, 8005-139, Portugal; galvaohugo@gmail.com

<sup>4</sup> Centre of Marine Sciences, University of Algarve, Campus de Gambelas, 8005-139 Faro, Portugal; ibmaia@ualg.pt

<sup>5</sup> Allmicroalgae Natural Products S.A., Apartado 9, 2449-909 Pataias, Portugal; joana.g.silva@allmicroalgae.com

<sup>6</sup> CICECO - Aveiro Institute of Materials, Department of Chemistry, University of Aveiro, Campus Universitário de Santiago, 3810-193 Aveiro, Portugal; claudianunes@ua.pt

\* Correspondence: ana.moreira@ua.pt; Tel.: +351-234-401-505

## Supplementary Materials

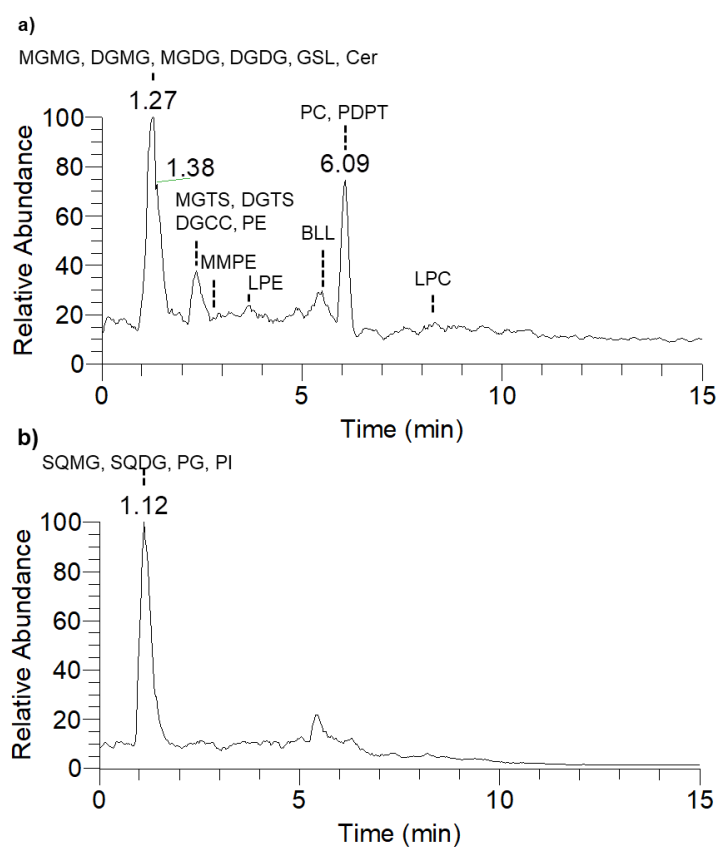

**Supplementary Figure S1.** Representative examples of LC-MS chromatograms obtained by analysis of the polar lipids extracts from *Emiliana huxleyi*, acquired on (a) positive mode and (b) negative mode.

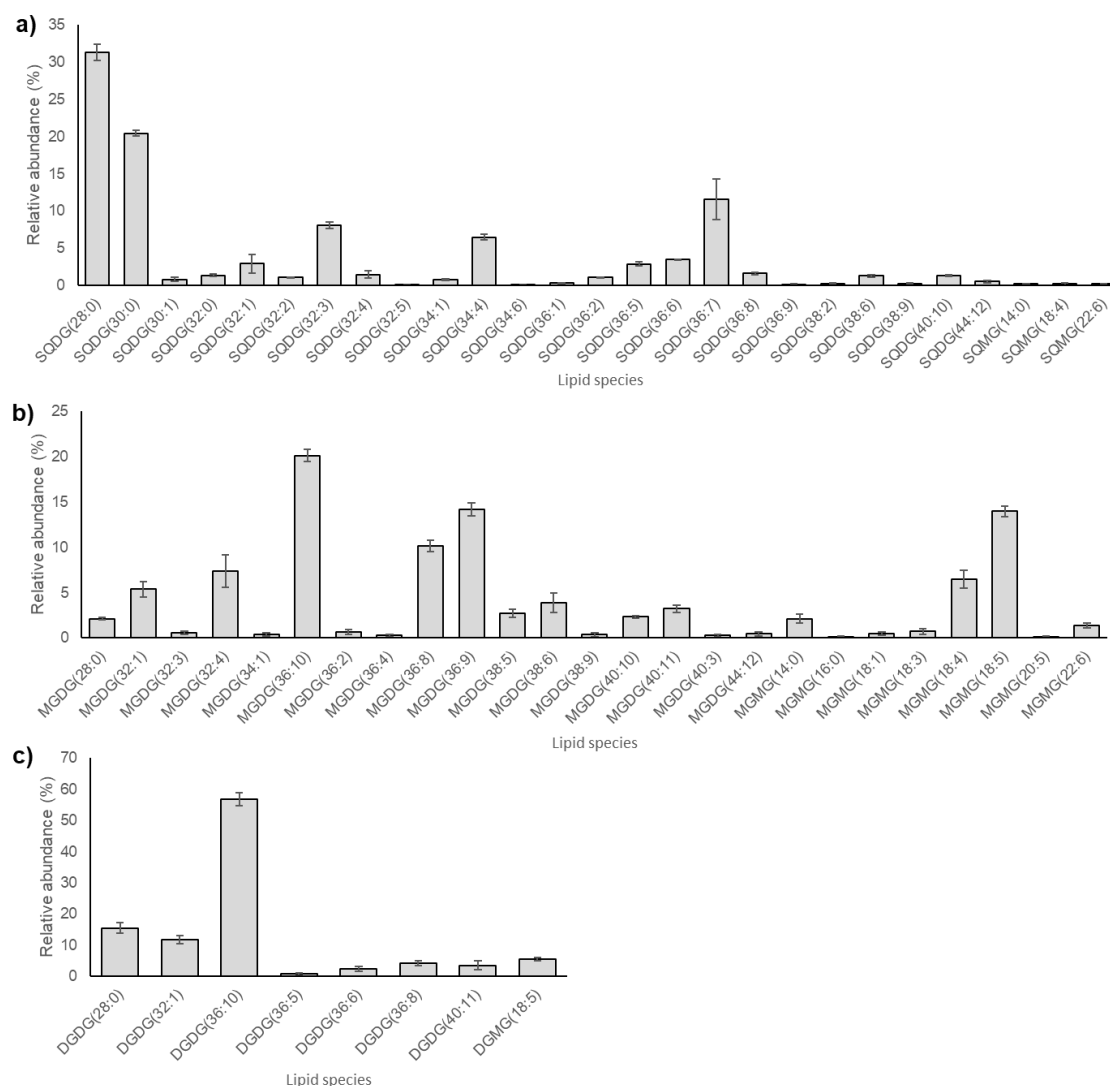

**Supplementary Figure S2.** Relative abundance of a) acidic and (b and c) neutral glycolipids identified by LC-MS from *Emiliana huxleyi*: (a) sulfoquinovosyldiacylglycerol (SQDG) and its lyso form, sulfoquinovosylmonoacylglycerol (SQMG); (b) monogalactosyldiacylglycerol (MGDG) and its lyso form, monogalactosylmonoacylglycerol (MGMG); (c) digalactosyldiacylglycerol (DGDG) and its lyso form, digalactosylmonoacylglycerol (DGMG).

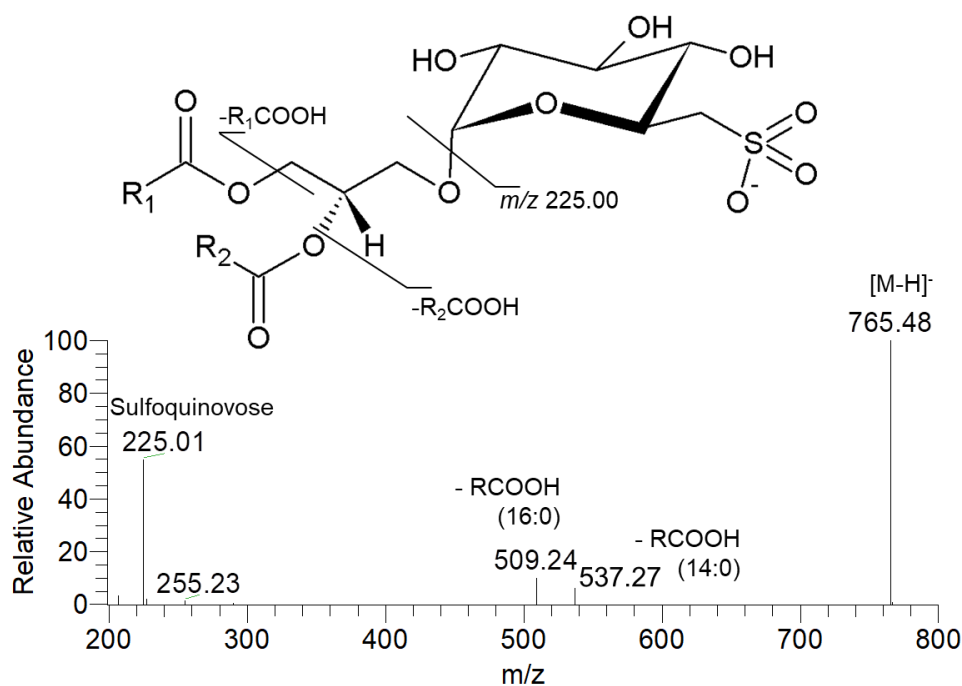

**Supplementary Figure S3.** LC-MS/MS spectrum of sulfoquinovosyldiacylglycerol SQDG (30:0) species observed in negative mode as  $[\text{M}-\text{H}]^-$  ion at  $m/z$  765.48. The main fragmentation pathways and product ions are shown in the structure of the SQDG: the anion of the sulfoquinovosyl polar head group ( $\text{C}_6\text{H}_9\text{O}_4\text{SO}_3^-$ ) at  $m/z$  225.01 confirms the identification as sulfolipid; the product ions at  $m/z$  509.24 and 537.27, resulting from neutral loss of palmitic acid (16:0) (−256 Da) and myristic acid (14:0) (−228 Da), respectively, allow the identification in terms of fatty acyl composition as SQDG (14:0-16:0).

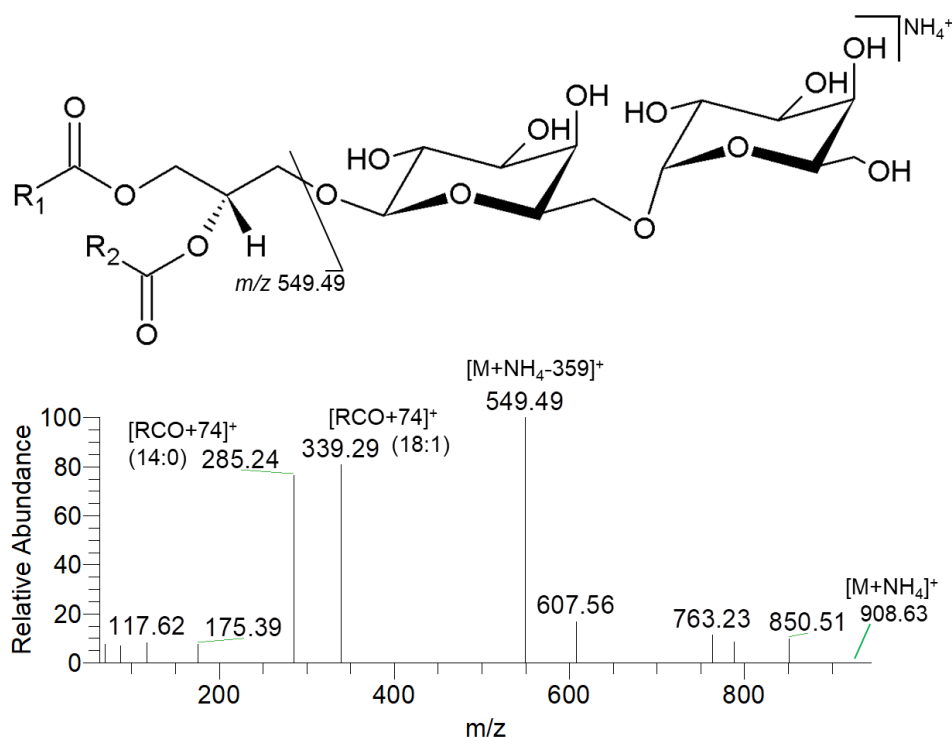

**Supplementary Figure S4.** LC-MS/MS spectrum of digalactosyl diacylglycerol DGDG (32:1) species observed in positive mode as [M+NH<sub>4</sub>]<sup>+</sup> ion at *m/z* 908.63. The main fragmentation pathways and product ions are shown in the structure of the DGDG: the product ion observed at *m/z* 549.49 (- 359 Da), resulting from a combined loss of NH<sub>3</sub> (-17 Da) and carbohydrate moiety (-180 Da plus 162 Da), corroborates the presence of a digalactosyl unit in the polar head; the product ions at *m/z* 285.24 and 339.29, corresponding to acylium ions plus 74 Da of the glycerol backbone (RCO + 74 Da) of fatty acids 14:0 and 18:1, respectively, support the identification in terms of fatty acyl composition as DGDG (14:0-18:1).

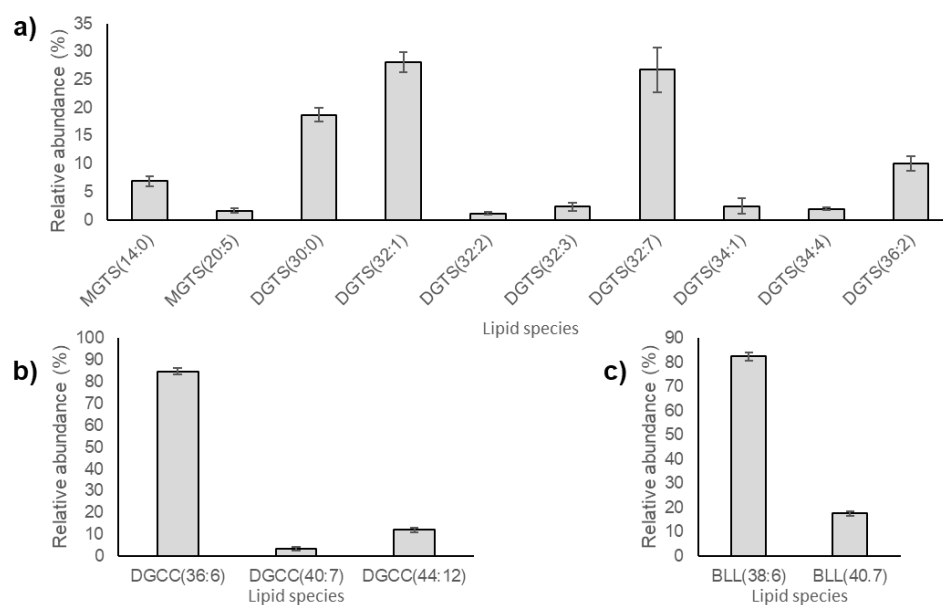

**Supplementary Figure S5.** Relative abundance of betaine lipid species identified by LC-MS from *Emiliana huxleyi*: a) monoacyl and diacylglyceryl-N,N,N-trimethyl homoserine (MGTS and DGTS); b) diacylglyceryl carboxyhydroxymethylcholine (DGCC); and c) betaine like lipids (BLL).

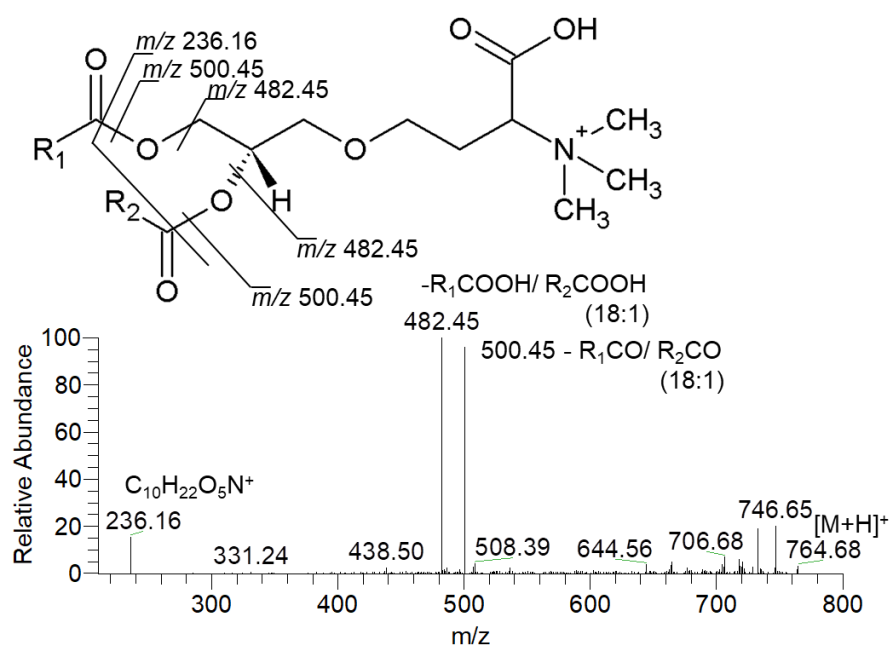

**Supplementary Figure S6.** LC-MS/MS spectrum of diacylglyceryl-N,N,N-trimethylhomoserine DGTS (36:2) species observed in positive mode as [M+H]<sup>+</sup> ion at *m/z* 764.68. The main fragmentation pathways and product ions are shown in the structure of the DGTS: the product ion at *m/z* 236.16 (C<sub>10</sub>H<sub>22</sub>O<sub>5</sub>N<sup>+</sup>), resulting from the combined loss of the two fatty acids as ketene derivatives (R<sub>1</sub>CO+R<sub>2</sub>CO), corroborates N,N,N-trimethylhomoserine as polar head; the product ions observed at *m/z* 500.45 and 482.45, corresponding to the loss of 18:1 as ketene (-264 Da) and acid (-282 Da) derivatives, allow the identification in terms of the fatty acyl composition as DGTS (18:1-18:1).

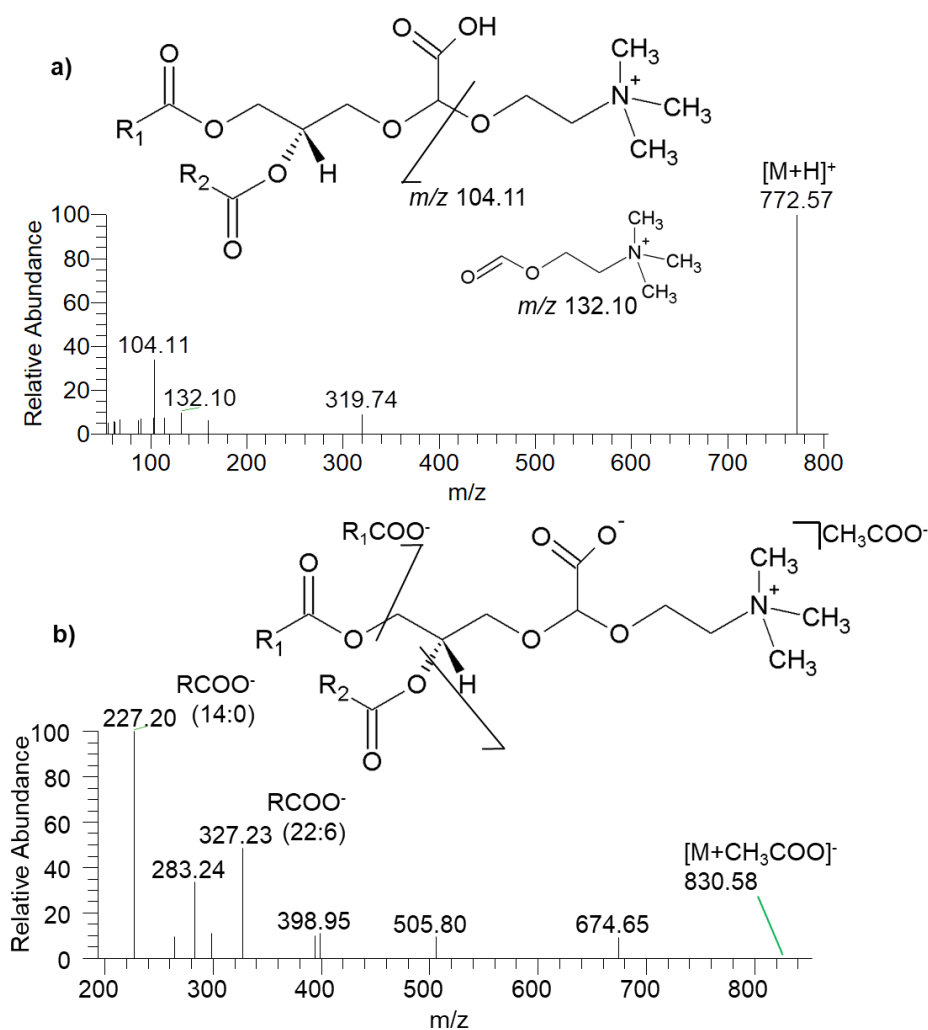

**Supplementary Figure S7.** LC-MS/MS spectra of diacylglycerol carboxyhydroxymethylcholine DGCC(36:6) species observed a) in positive mode as  $[M+H]^+$  ion at  $m/z$  772.57 and b) in negative mode as  $[M+CH_3COO]^-$  ion at  $m/z$  830.58. The main fragmentation pathways and product ions are shown in the structure of the DGTS: the product ions at  $m/z$  104.11 ( $C_5H_{14}NO^+$ ) and  $m/z$  132.10 ( $C_6H_{14}NO_2^+$ ), in positive mode (a), corroborate the identification of the DGCC polar head group; in negative mode (b), the product ions at  $m/z$  227.20 and  $m/z$  327.23 correspond to the fatty acyl carboxylate anions of 14:0 and 22:6, which allow the identification in terms of the fatty acyl composition as DGCC (14:0-22:6).



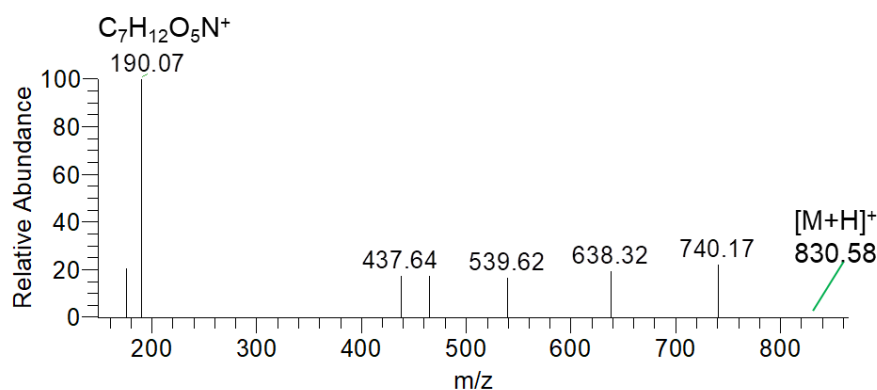

**Supplementary Figure S8.** LC-MS/MS spectrum of betaine like lipid BLL (38:6) species observed in positive mode as  $[M+H]^+$  ion at  $m/z$  830.58. The product ion observed at  $m/z$  190.07 ( $C_7H_{12}O_5N^+$ ) confirms the identification as BLL.

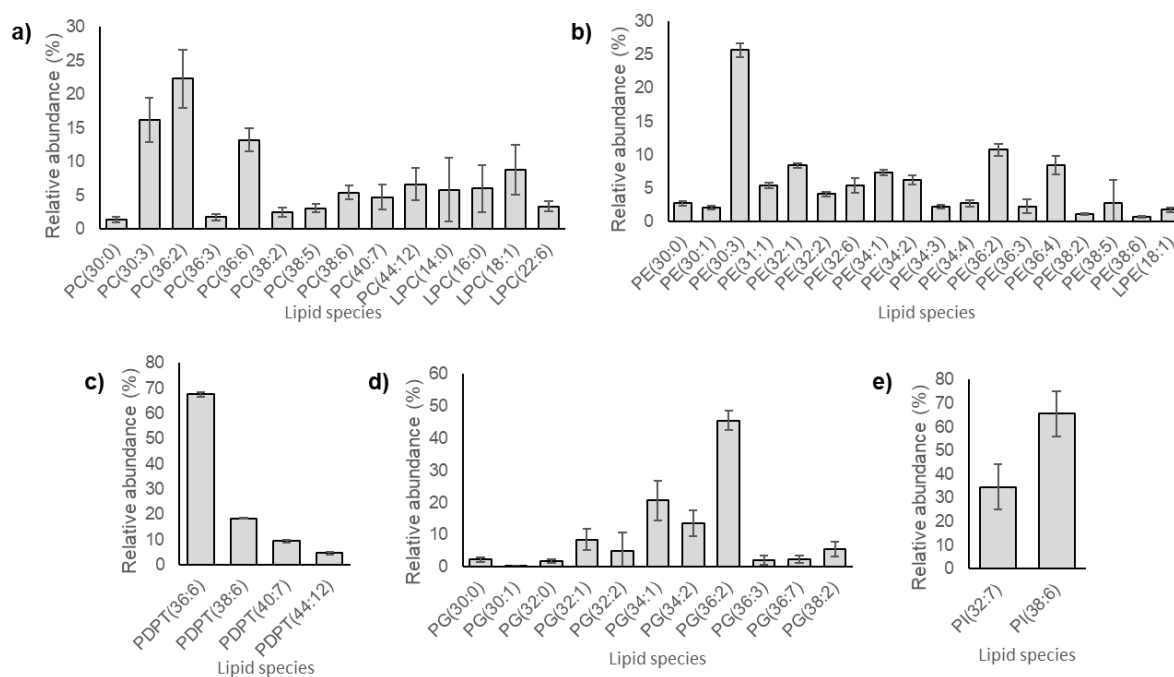

**Supplementary Figure S9.** Relative abundance of phospholipids species identified by LC-MS from *Emiliana huxleyi*: (a) phosphatidylcholine (PC) and its lyso form, lysophosphatidylcholine (LPC); (b) phosphatidylethanolamine (PE) and its lyso form, lysophosphatidylethanolamine (LPE); (c) phosphatidyltrimethylpropanethiol (PDPT); (d) phosphatidylglycerol (PG) and (e) phosphatidylinositol (PI).

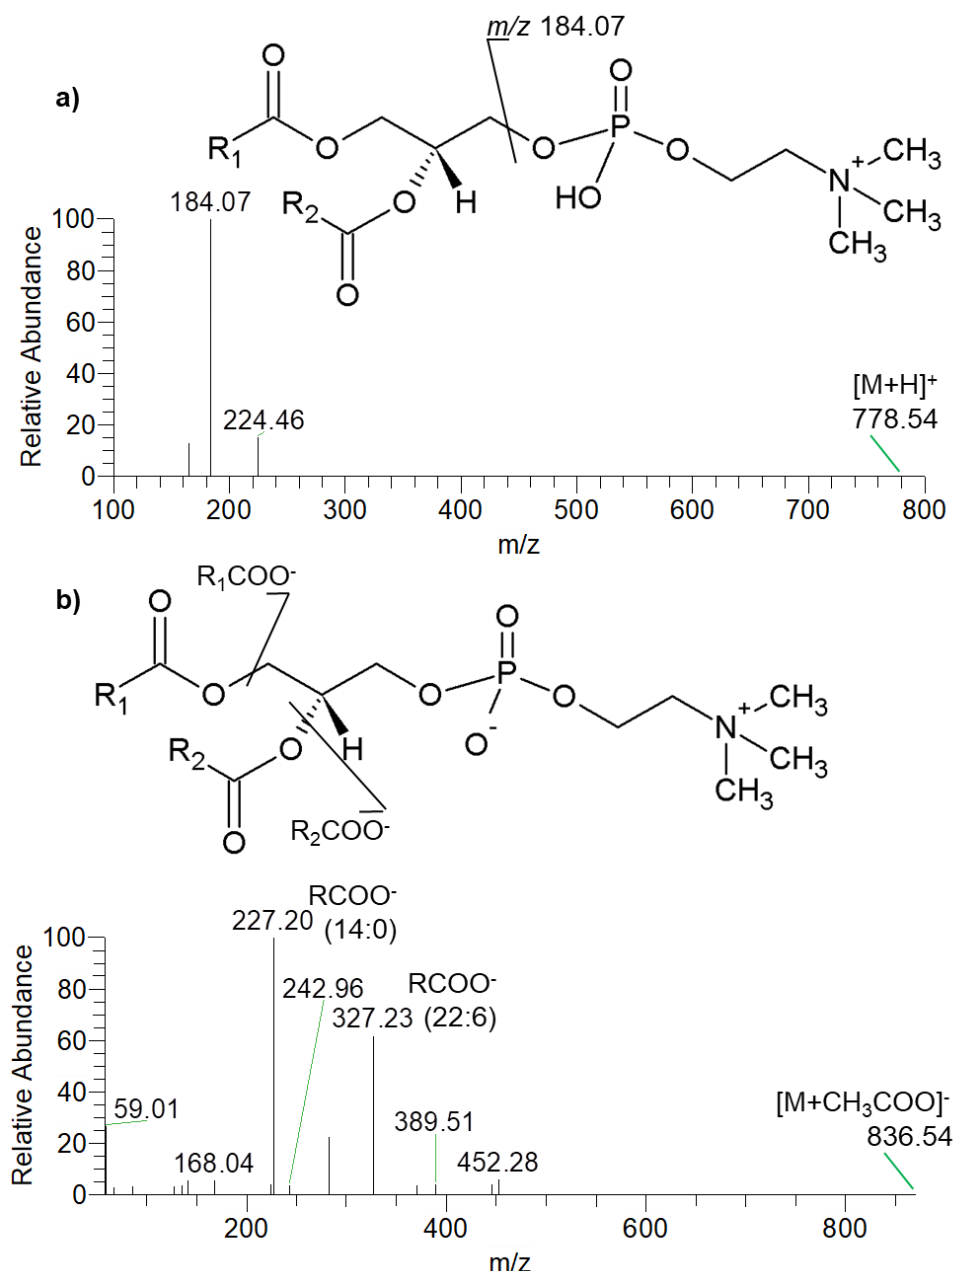

**Supplementary Figure S10.** LC-MS/MS spectra of phosphatidylcholine PC (36:6) species observed (a) in positive mode as  $[M+H]^+$  ion at  $m/z$  778.54 and (b) in negative mode as  $[M+CH_3COO]^-$  ion at  $m/z$  836.54. The main fragmentation pathways and product ions are shown in the structure of the PC: the product ion observed at  $m/z$  184.07, in positive mode (a), corresponds to the phosphocholine anion ( $C_5H_{15}NO_4P^+$ ) and corroborates the identification as PC; the product ions at  $m/z$  227.20 and  $m/z$  327.23, in negative mode (b), correspond to fatty acyl carboxylate anions of 14:0 and 22:6, respectively, and allow the identification of the fatty acyl composition of PC (14:0-22:6).

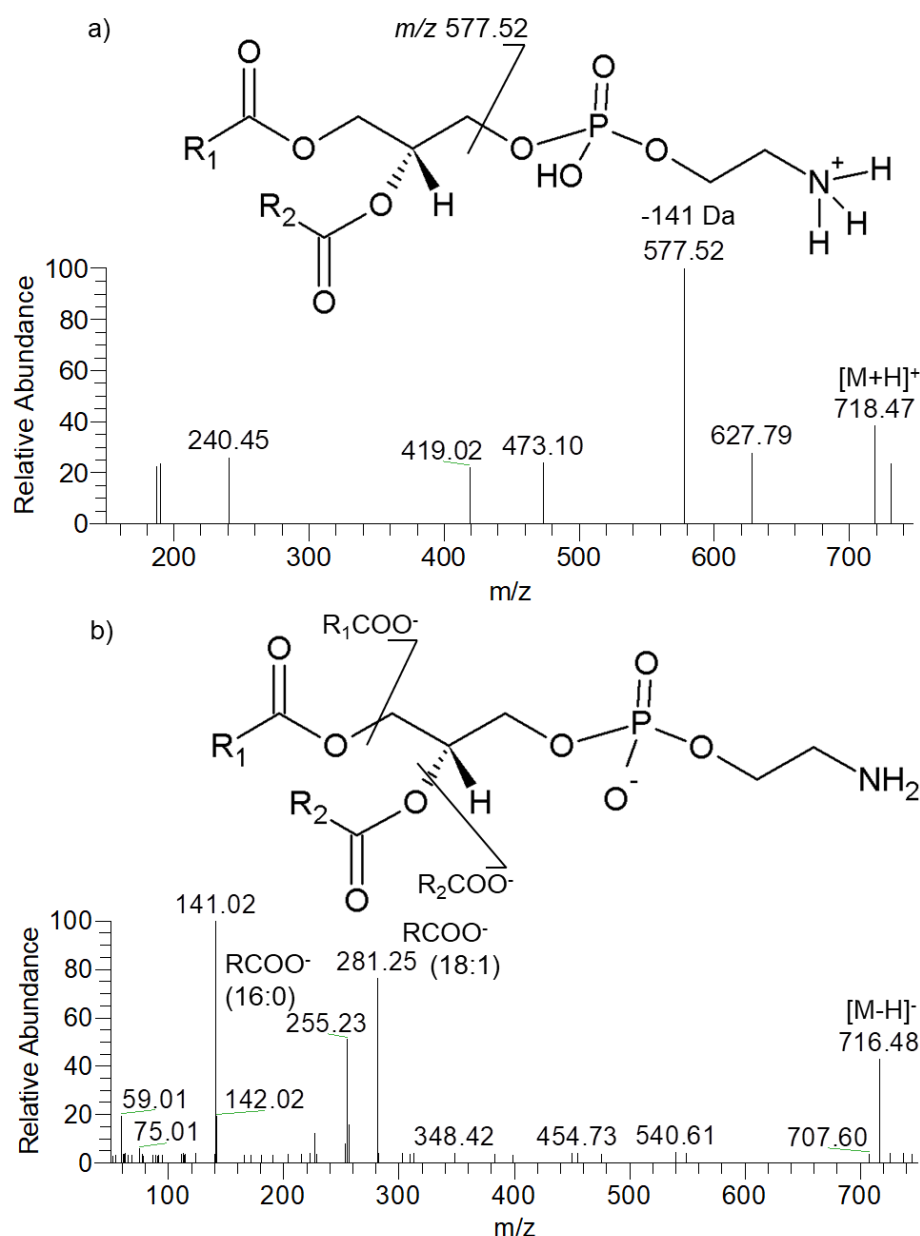

**Supplementary Figure S11.** LC-MS/MS spectra of phosphatidylethanolamine PE (34:1) species observed in (a) positive mode as  $[M+H]^+$  ion at  $m/z$  718.47 and (b) in negative mode as  $[M-H]^-$  ion at  $m/z$  716.48. The main fragmentation pathways and product ions are shown in the structure of the PE: the product ion observed at  $m/z$  577.52, in positive mode (a), resulted from the characteristic neutral loss of polar head group ( $-141$  Da) and corroborates the identification as PE; the product ions at  $m/z$  255.23 and  $m/z$  281.25, in negative mode (b), correspond to fatty acyl carboxylate anions of 16:0 and 18:1, respectively, and allow the identification of the fatty acyl composition of PE (16:0-18:1).

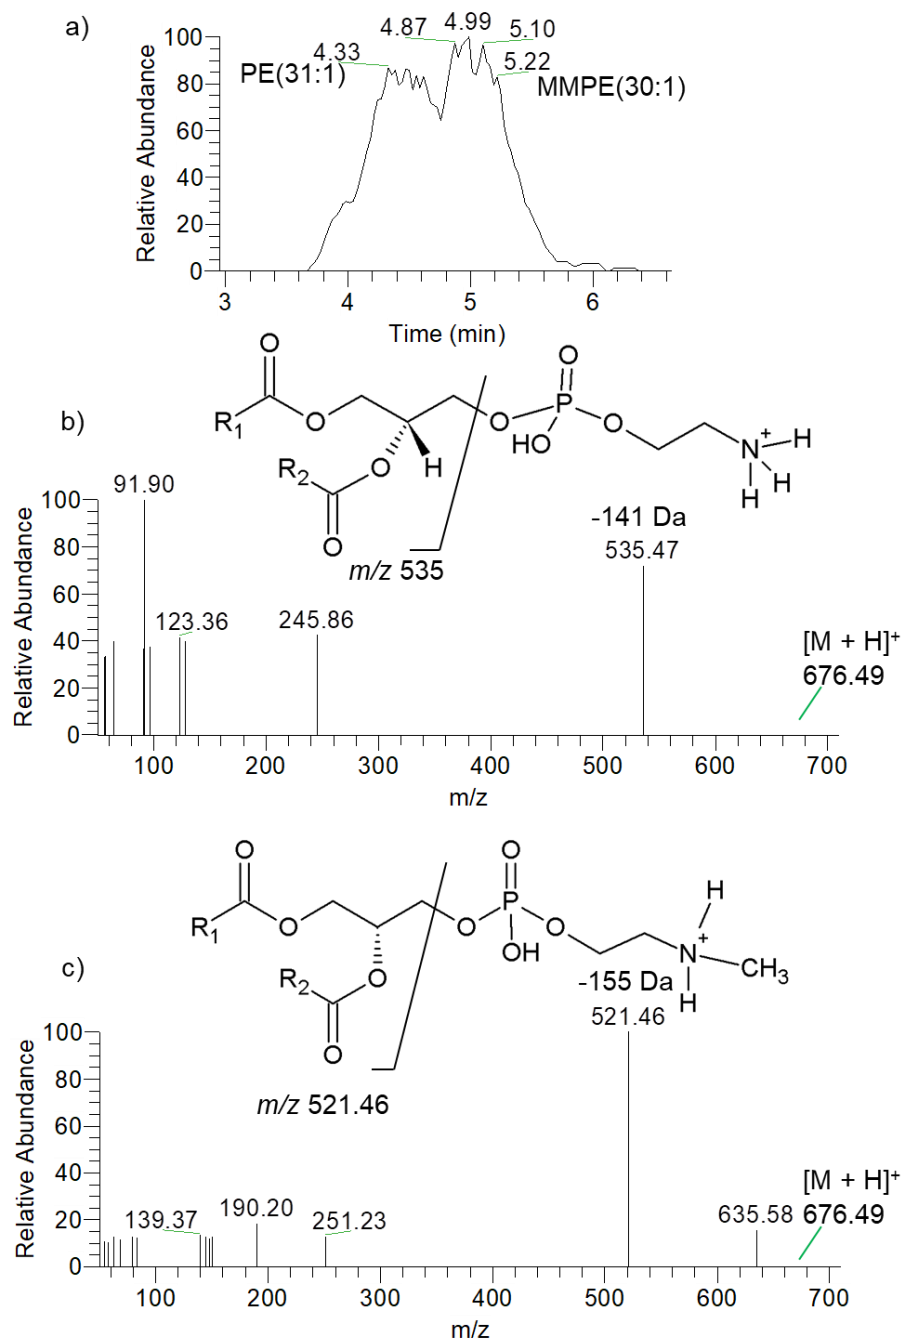

**Supplementary Figure S12.** (a) Extracted ion current chromatogram of isomeric species, phosphatidylethanolamine PE (31:1) and monomethylphosphatidylethanolamine MMPE (30:1) species, observed in positive mode as  $[M+H]^+$  ions at  $m/z$  676.49. LC-MS/MS spectra of respective  $[M+H]^+$  ion of (b) PE (31:1) (retention time: 4.33 min) and (c) MMPE (30:1) (retention time: 5.22 min).

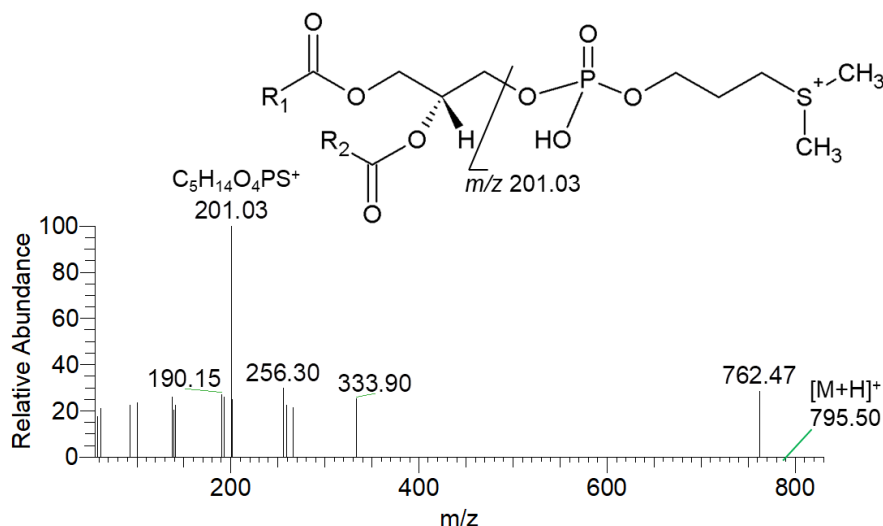

**Supplementary Figure S13.** LC-MS/MS spectrum of phosphatidyltrimethylpropanethiol PDPT (36:6) species observed in positive mode as  $[M+H]^+$  ion at  $m/z$  795.50. The main fragmentation pathway of polar head group and product ion is shown in the structure of the PDPT: the product ion observed at  $m/z$  201.03 ( $C_5H_{14}O_4PS^+$ ), corresponding to the PDPT polar head, corroborates the identification as PDPT.

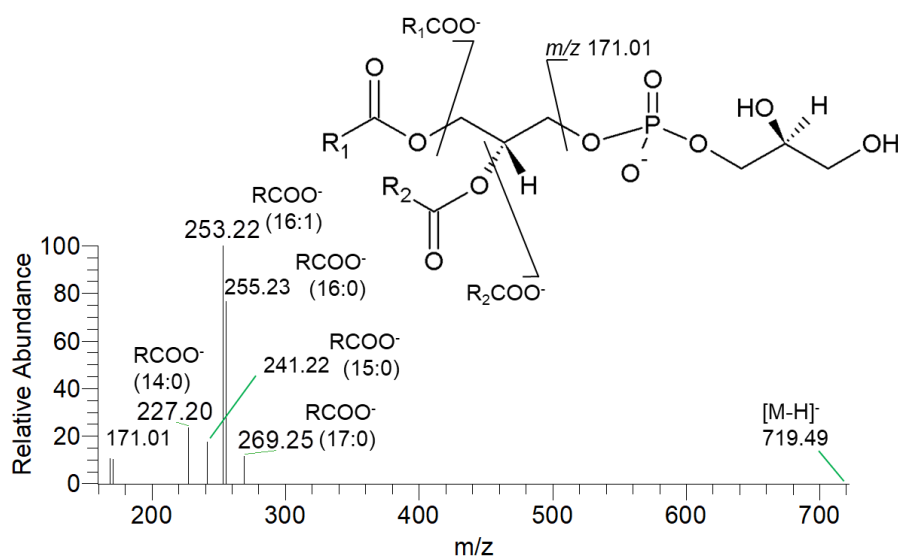

**Supplementary Figure S14.** LC-MS/MS spectrum of phosphatidylglycerol PG (32:1) species observed in negative mode as  $[M-H]^-$  ion at  $m/z$  719.49. The main fragmentation pathways and product ions are shown in the structure of the PG: the product ion at  $m/z$  171.01 ( $C_3H_7O_2OPO_3H$ ), corresponding to the glycerol phosphate anion, corroborates the identification as PG species; the product ions  $m/z$  227.20, 253.22, 255.23, 241.22 and 269.25 correspond to fatty acyl carboxylate anions of 14:0, 15:0, 16:1, 16:0 and 17:0 respectively, and allow to identify different fatty acyl compositions of PG (32:1), namely 14:0-18:1, 15:0-17:1, 17:0-15:1.

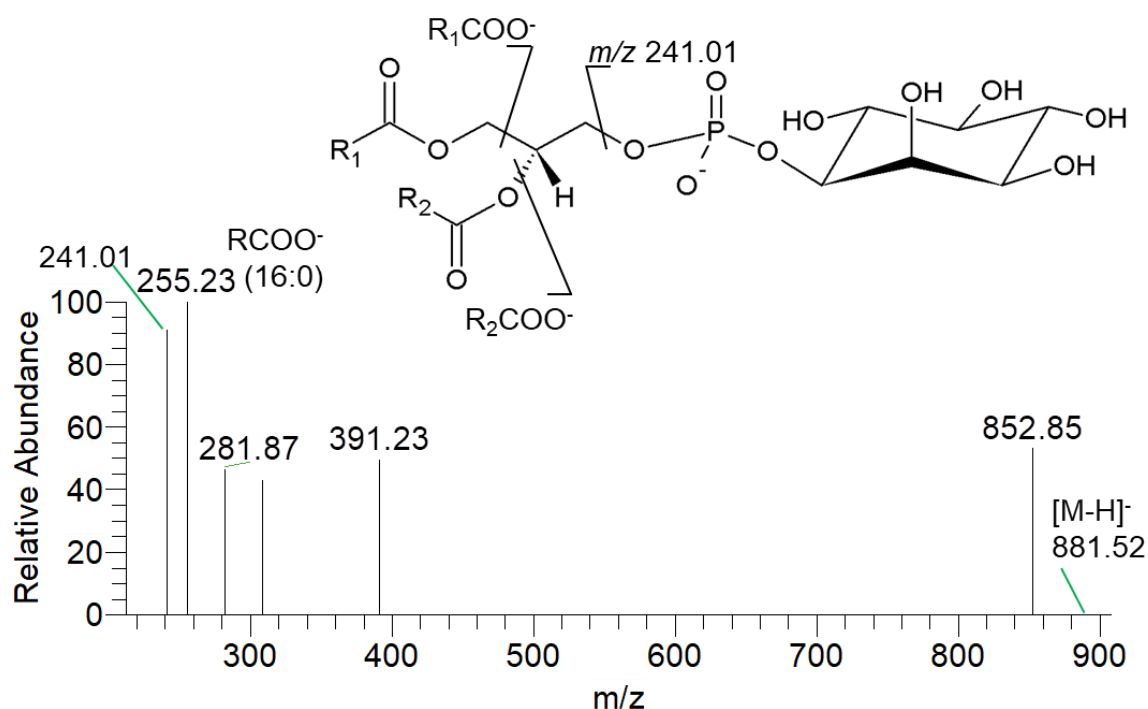

**Supplementary Figure S15.** LC-MS/MS spectrum of phosphatidylinositol PI (38:6) species observed in negative mode as [M-H]<sup>-</sup> ion at *m/z* 881.52. The main fragmentation pathways and product ions are shown in the structure of the PI: the product ion at *m/z* 241.01 (C<sub>6</sub>H<sub>10</sub>O<sub>5</sub>PO<sub>3</sub>), corresponding to an inositol-1,2-cyclic phosphate anion, corroborates the identification as PI species; the product ion observed at *m/z* 255.23, corresponding to fatty acyl carboxylate anion of 16:0, allows to infer the fatty acyl composition as PI (16:0-22:6).

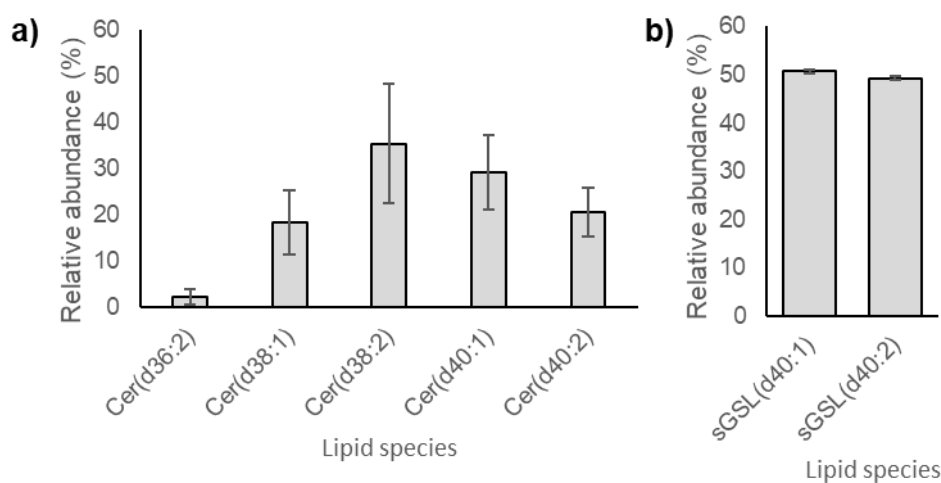

**Supplementary Figure S16.** Relative abundance of sphingolipid species identified by LC-MS from *Emiliana huxleyi*: (a) ceramides (Cer) and (b) sialic acid glycosphingolipids (sGSL).

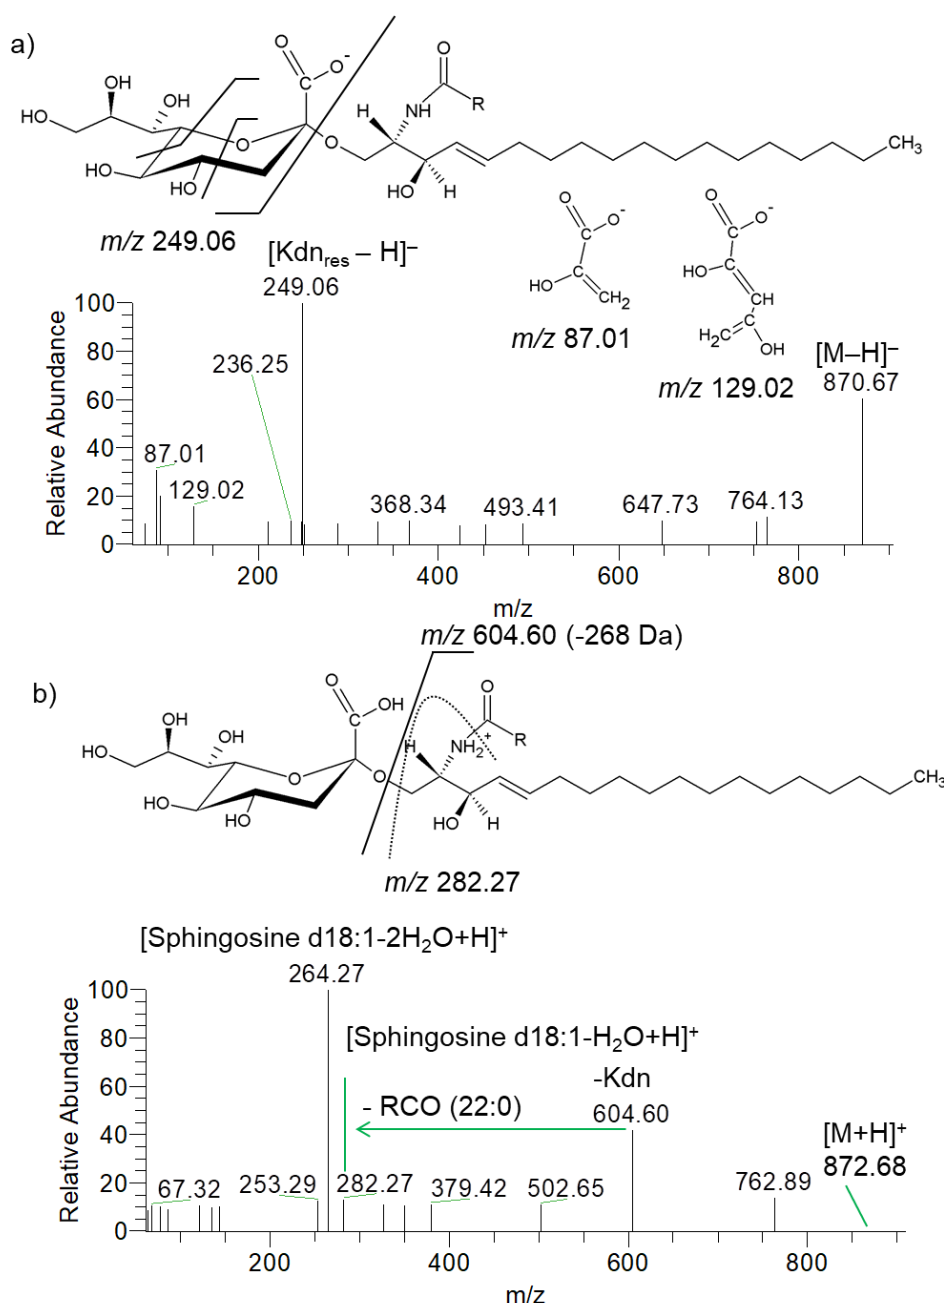

**Supplementary Figure S17.** LC-MS/MS spectra of sialic acid glycosphingolipids sGSL (d18:1/22:0) species observed a) in positive mode as  $[M+H]^+$  ion at  $m/z$  872.68 and b) in negative mode as  $[M-H]^-$  ion at  $m/z$  870.67. The main fragmentation pathways and product ions are shown in the structure of the sGSL: the product ion observed, in negative mode (a), at  $m/z$  249.06 ( $C_9H_{13}O_8$ ), attributed to a single sialic acid 2-keto-3-deoxynononic acid residue (Kdn<sub>res</sub>), corroborates the presence of Kdn in the sGSL head group; the two product ions observed in negative mode at  $m/z$  129.02 ( $C_5H_5O_4$ ) and 87.01 ( $C_3H_3O_3$ ), result from cross-ring cleavages of the Kdn; the product ions observed in positive mode (b) at  $m/z$  264.27 and 282.27, corroborates the presence of sphingosine d18:1; the product ion observed in positive mode (b) at  $m/z$  604.60 results from a neutral loss of Kdn and supports the identification as sGSL; the fatty acyl composition was found by the mass difference (322 Da) between product ions observed in positive mode (b) at  $m/z$  604.60 and 282.27, corresponding to the fatty acid 22:0 as a ketene derivative.

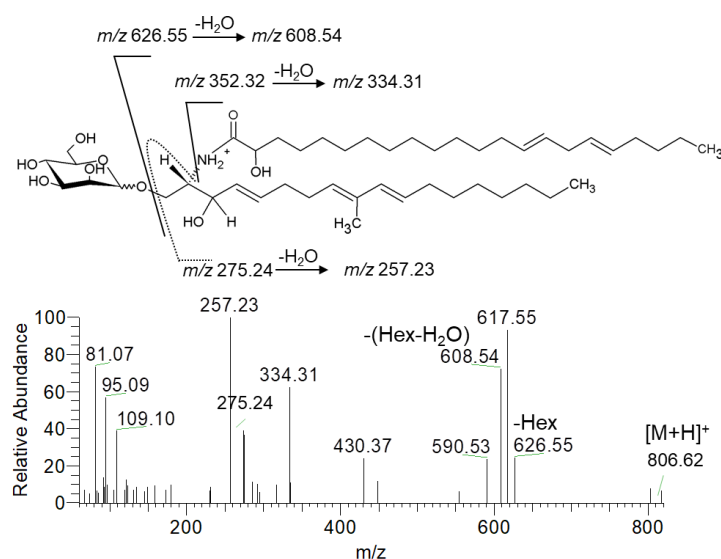

**Supplementary Figure S18.** LC-MS/MS spectrum of host glycosphingolipid hGSL (d19:3/h22:2) species observed in positive mode as  $[M+H]^+$  ion at  $m/z$  806.62. The main fragmentation pathways and product ions are shown in the structure of the hGSL: the product ions observed at  $m/z$  626.55 (-180 Da) and 608.54 (-198 Da), result from glycosidic cleavage with neutral loss of an hexose (Hex) and an additional loss of water, respectively; an amino fatty acid product ion ( $m/z$  334.31) and long-chain base product ions ( $m/z$  275.24 and 257.23) were also observed.

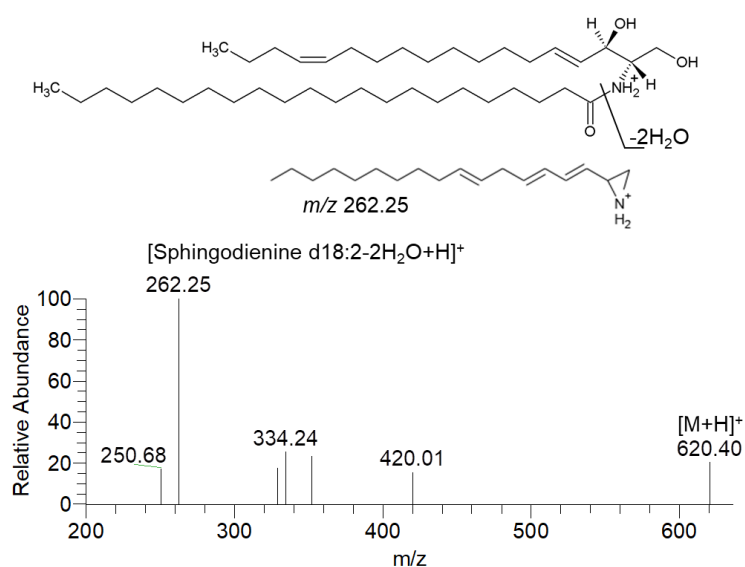

**Supplementary Figure S19.** LC-MS/MS spectrum of ceramide Cer (d18:2/22:0) species observed in positive mode as  $[M+H]^+$  ion at  $m/z$  620.40. The main fragmentation pathway and product ion are shown in the structure of the Cer: the product ion observed at  $m/z$  262.25, corresponding to  $[Sphingodienine\ d18:2-2H_2O+H]^+$ , corroborates the identification as ceramide.
